# Supplementary material
Source: publisher figshare collection journal article supplement (https://gsapubs.figshare.com/ndownloader/files/39478033)
Supplement: Supplementary file 1 [file 39478033]

## Sheet: Sheet2
TABLE S5 MAJOR (WT.%) AND TRACE ELEMENT (PPM) DATA FOR THE MAGMATIC ROCKS FROM THE NORTHERN YILI BLOCK
	C15YN08	C15YN09	C15YN10	C15YN11	C15YN12	C15YN21	C15YN22	C15YN23	C15YN24	C15YN25	C15YN27	C15YN28	C15YN29	C15YN30	C15YN31	C15YN14	C15YN15	C15YN16	C15YN17	C15YN18	N15JH20	N15JH21	N15JH22	N15JH23	N15JH24	N15JH26	N15JH27	N15JH28	N15JH29	N15JH30	GBW07105	SARM-4	GBM908-10	MRGeo08	OREAS-120	STSD-1
	Granodiorite															Dioritic microgranular enclaves					Granitic porphyry										Standards (major elements)		Standards (trace elements)
Major element(wt.%)
SiO2	67.27	67	66.25	66.93	66.78	66.56	66.4	65.55	65.98	69.67	65.68	65.03	66.16	64.83	64.01	58.35	57.42	54.03	55.6	57.15	69.53	68.61	69.16	69.56	68.53	69.21	68.65	68.9	68.83	67.76	44.67	52.96
Al2O3	15.12	15.16	15.64	15.25	15.26	15.6	15.93	16.02	16.08	14.91	16.1	15.97	15.89	15.86	16.23	14.55	14.6	13.83	14.94	15.09	15.21	15.67	15.28	15.32	15.1	15.02	14.99	15.14	15.24	15.7	14	16.66
CaO	3.8	3.71	3.84	3.32	3.84	3.26	3.71	4.12	3.45	2.19	3.96	4.58	4.03	4.46	4.33	5.43	6.38	7.79	6.5	6.76	2.36	2.29	1.86	1.91	2.24	2.23	2.21	2.08	1.94	2.53	8.88	11.45
TFe2O3	3.67	3.71	3.84	3.62	3.77	4.01	3.82	4.32	3.67	3.2	3.91	4.31	3.91	4.23	4.5	7.68	7.75	8.08	8.19	8.23	2.29	2.68	2.38	2.3	2.37	2.18	2.36	2.2	2.44	2.5	13.33	8.98
K2O	2.35	2.53	2.27	2.73	2.49	2.48	2.52	2.22	2.68	3.2	2.19	2.09	2.14	2.01	1.88	1.94	1.76	2.24	2.05	1.58	2.97	2.98	3.03	3.01	2.68	2.64	3.82	2.55	2.8	3.78	2.3	0.25
MgO	2.3	2.14	2.21	2.21	2.21	2.4	2.13	2.47	1.89	1.61	2.4	2.59	2.36	2.53	2.77	5.98	6.63	8.63	6.52	5.95	1.26	1.4	1.34	1.33	1.47	1.26	1.44	1.36	1.5	1.52	7.73	7.58
MnO	0.07	0.07	0.08	0.07	0.07	0.06	0.07	0.08	0.07	0.06	0.07	0.08	0.07	0.08	0.08	0.18	0.18	0.2	0.18	0.2	0.05	0.05	0.04	0.05	0.04	0.04	0.04	0.04	0.04	0.05	0.18	0.19
Na2O	3.39	3.4	3.57	3.75	3.6	3.75	3.72	3.6	4.31	3.7	3.76	3.57	3.72	3.59	3.85	3.63	3.23	3.13	3.5	3.55	4.51	4.81	4.85	4.62	4.5	4.74	3.75	4.87	5.03	3.76	3.33	2.43
P2O5	0.1	0.1	0.1	0.1	0.11	0.12	0.11	0.14	0.11	0.08	0.11	0.12	0.11	0.12	0.13	0.11	0.14	0.11	0.13	0.14	0.1	0.12	0.11	0.1	0.11	0.1	0.11	0.1	0.11	0.11	0.98	0.01
TiO2	0.45	0.46	0.47	0.43	0.47	0.5	0.47	0.54	0.47	0.4	0.49	0.54	0.49	0.54	0.58	0.64	0.67	0.58	0.72	0.74	0.3	0.36	0.3	0.3	0.31	0.28	0.31	0.28	0.32	0.32	2.36	0.18
LOI 1000	1.46	1.4	1.46	1.62	1.56	1.76	1.75	1.58	1.48	1.52	1.61	1.59	1.66	1.71	1.89	1.68	1.68	1.72	1.84	1.04	1.38	1.55	1.81	2.18	2.39	2.05	1.97	2.37	1.64	1.93
Total	100.04	99.74	99.79	100.1	100.23	100.56	100.69	100.69	100.25	100.6	100.33	100.53	100.59	100.01	100.31	100.28	100.54	100.47	100.28	100.51	100.03	100.6	100.24	100.76	99.8	99.82	99.81	99.95	99.98	100.09
Mg#	52.7646	50.6938	53.2724	54.7378	53.7301	54.2458	52.4838	53.1091	50.4987	49.9162	54.8719	54.3461	54.4554	54.2294	54.9422	60.6677	62.8894	67.9052	61.1952	58.8839	52.1518	50.8554	52.7256	53.3906	55.1303	53.3786	54.7245	55.0475	54.9099	54.6362
K2O+Na2O	5.74	5.93	5.84	6.48	6.09	6.23	6.24	5.82	6.99	6.9	5.95	5.66	5.86	5.6	5.73	5.57	4.99	5.37	5.55	5.13	7.48	7.79	7.88	7.63	7.18	7.38	7.57	7.42	7.83	7.54
Na2O/K2O	1.44255	1.34387	1.57269	1.37363	1.44578	1.5121	1.47619	1.62162	1.60821	1.15625	1.71689	1.70813	1.73832	1.78607	2.04787	1.87113	1.83523	1.39732	1.70732	2.24684	1.51852	1.61409	1.60066	1.53488	1.6791	1.79545	0.981675	1.9098	1.79643	0.994709
ACNK	0.848623	0.851716	0.862734	0.866591	0.828605	0.908381	0.86978	0.850431	0.855491	0.984552	0.862799	0.805748	0.848887	0.814997	0.835936	0.66367	0.621471	0.503926	0.608367	0.608645	0.912941	0.922506	0.954409	0.973482	0.942377	0.918697	0.939814	0.941369	0.937243	0.937929
ANK	1.86044	1.81799	1.87611	1.67001	1.76938	1.76064	1.79909	1.92282	1.6082	1.55972	1.88036	1.96165	1.88223	1.96113	1.93817	1.8014	2.02114	1.82454	1.87159	1.99741	1.42918	1.40578	1.35618	1.4098	1.46441	1.40864	1.4533	1.40459	1.34707	1.52612
Ti	2697.3	2757.24	2817.18	2577.42	2817.18	2996.99	2817.18	3236.75	2817.18	2397.6	2937.06	3236.75	2937.06	3236.75	3476.51	3836.15	4015.97	3476.51	4315.67	4435.55	1798.2	2157.84	1798.2	1798.2	1858.14	1678.32	1858.14	1678.32	1918.08	1918.08
K	19508.5	21002.8	18844.4	22663.1	20670.7	20587.7	20919.8	18429.3	22248	26564.8	18180.3	17350.1	17765.2	16686	15606.8	16104.9	14610.6	18595.3	17018.1	13116.4	24655.4	24738.4	25153.5	24987.5	22248	21915.9	31711.7	21168.8	23244.2	31379.6
P	436.382	436.382	436.382	436.382	480.02	523.658	480.02	610.935	480.02	349.106	480.02	523.658	480.02	523.658	567.297	480.02	610.935	480.02	567.297	610.935	436.382	523.658	480.02	436.382	480.02	436.382	480.02	436.382	480.02	480.02
Trace element (ppm)
Ba	463	507	449	523	501	441	464	417	449	384	446	440	411	413	416	483	357	314	451	337	604	618	636	626	539	635	1445	507	684	1185					1030	660
Ce	35.7	39.8	38.5	40.1	40.8	35.4	37.5	38.5	44.1	37.5	35.6	38.3	38.2	35.8	36.4	49	44.3	50.5	54.1	56.1	35.7	37.4	37.1	35.3	36.4	36.4	36.4	36	38.8	39.2					50.6	51.2
Cr	70	60	70	80	60	60	50	60	40	30	60	80	70	70	70	370	450	700	400	300	30	30	30	30	30	30	40	40	40	40					139	93
Cs	2.65	3.37	3.35	2.59	2.01	2.32	2.74	4.35	2.14	2.88	4.18	3.22	4.01	3.05	3.22	2.19	2.51	1.98	1.96	3.48	1.64	1.7	2.03	2.66	2.44	1.87	2.63	2.34	1.52	2.79					0.8	1.84
Dy	2.59	2.8	2.8	2.65	2.73	2.94	2.63	2.99	3	2.47	2.64	3.12	2.87	2.79	2.9	5.29	4.21	5.51	6.12	6.04	1.91	2.06	1.88	1.78	1.87	1.92	1.92	2.05	1.96	2					2.68	6.26
Er	1.43	1.59	1.58	1.45	1.59	1.64	1.6	1.67	1.75	1.49	1.56	1.69	1.57	1.59	1.65	3.23	2.42	3.31	3.63	3.48	1.11	1.2	1.11	0.99	1	1.03	1.07	1.02	1.09	1.09					1.4	3.86
Eu	0.76	0.85	0.87	0.78	0.83	0.89	0.86	0.93	0.94	0.68	0.89	0.95	0.84	0.88	0.94	1.29	1.35	1.51	1.56	1.52	0.76	0.74	0.8	0.75	0.72	0.66	0.61	0.67	0.79	0.76					1.15	1.59
Ga	16.3	17.3	17.4	16.4	17.3	17.6	17	18.2	17.8	15.7	17.8	17.5	17.4	17.4	17.6	16.7	17.2	16.4	18.1	19	19.5	20.8	19.2	19.7	19	19.4	19	19.2	18.8	19.9					10.9	12.5
Gd	2.73	2.9	3.01	2.82	3.05	3.29	2.94	3.24	3.42	2.7	2.96	3.3	3.09	3.17	3.35	5.88	4.72	5.86	6.72	6.41	2.33	2.5	2.54	2.34	2.4	2.46	2.23	2.38	2.49	2.39					3.03	6.77
Hf	3.7	4	3.9	3.7	4.5	4.2	4.1	4.2	4.2	3.2	3.9	4.1	3.9	4.1	3.9	3.5	3	3.1	3.7	3.6	3.2	3.4	3	2.9	3	3.1	3.1	3.1	3	3.1					6.9	6.1
Ho	0.52	0.57	0.56	0.53	0.57	0.57	0.54	0.59	0.63	0.51	0.55	0.6	0.58	0.57	0.57	1.1	0.84	1.16	1.23	1.2	0.38	0.42	0.38	0.32	0.36	0.36	0.34	0.34	0.36	0.37					0.51	1.33
La	18.3	20.4	19.7	21.4	20.8	17.3	18.8	19.2	22.1	19.7	18.1	18.8	19.4	17.9	18.4	19.3	18	18.6	20.4	22.4	17.9	19.1	19.2	18.1	18.2	18.4	18.8	18.2	19.9	20.4					22.3	28.6
Lu	0.25	0.27	0.27	0.24	0.27	0.27	0.28	0.26	0.28	0.27	0.26	0.27	0.29	0.26	0.27	0.53	0.39	0.6	0.59	0.59	0.17	0.18	0.16	0.15	0.15	0.16	0.15	0.16	0.16	0.17					0.2	0.58
Nb	7.1	7.3	7.4	7	7.5	7.3	7.8	8	7.5	7.9	7.8	7.5	8.1	7.2	7.8	7.6	7	6.8	8.8	8.6	6.9	7.4	6.7	6.5	6.6	7	6.4	6.6	6.6	6.8					8.6	6.8
Nd	14.2	15.6	15.5	15.3	15.6	15.6	15.1	16.4	17.4	13.9	15	16.6	15.5	15.6	16.2	27.1	22	27.9	30.2	30.4	15.2	15.8	16	14.9	15.5	14.9	15.7	15	16.6	17.1					20.2	32.4
Pr	3.71	4.07	4.04	4.1	4.23	3.91	3.97	4.23	4.68	3.87	3.8	4.31	4.17	4.02	4.1	6.45	5.45	6.67	7.09	7.33	4.25	4.36	4.43	4.06	4.14	4.23	4.27	4.19	4.51	4.51					5.43	8.07
Rb	88.2	95.6	87.2	120.5	97.8	111	107	94.8	110	131	93.7	81.7	88.3	80.6	83.5	86.5	66.8	102	82.5	66.8	91.2	89.4	95.3	107	84.8	87.5	139.5	89.4	96.4	135					90.9	31.8
Sm	2.78	3.04	2.87	2.78	3.22	3.15	2.9	3.36	3.36	2.77	2.9	3.46	3.13	3.23	3.27	5.79	4.6	5.71	6.52	6.38	3.01	3.28	3.22	2.8	2.79	2.94	2.87	2.93	2.96	3.05					3.78	7.01
Sn	3	3	2	2	3	3	2	2	3	3	3	2	3	2	2	4	3	4	4	4	2	2	2	2	2	2	2	2	2	2			3.4	4.4
Sr	356	375	406	318	350	336	406	463	239	278	440	426	392	428	414	369	367	259	342	350	694	657	494	475	539	571	660	420	524	703					137	210
Ta	0.6	0.7	0.7	0.7	0.7	0.7	0.8	0.7	0.8	1	0.9	0.6	1.2	0.6	0.6	0.6	0.6	0.6	0.6	0.6	0.8	0.8	0.7	0.7	0.7	0.7	0.7	0.7	0.7	0.8			0.74	1.54
Tb	0.41	0.44	0.46	0.42	0.45	0.48	0.45	0.48	0.48	0.4	0.42	0.51	0.46	0.47	0.48	0.87	0.67	0.87	1.01	0.93	0.32	0.36	0.35	0.36	0.31	0.33	0.33	0.3	0.33	0.34					0.47	1.07
Th	10.55	9.96	9.51	11.5	8.8	7.21	8.73	7.67	11.3	15.15	7.15	6.62	8.22	6.99	5.89	4.46	4.22	4.85	4.4	4.91	6.99	6.99	6.74	6.6	6.41	6.92	6.53	6.91	6.59	6.83					19.65	20.4
Tm	0.22	0.25	0.25	0.24	0.25	0.26	0.25	0.27	0.25	0.24	0.26	0.28	0.25	0.26	0.26	0.52	0.37	0.54	0.55	0.56	0.18	0.18	0.16	0.15	0.15	0.14	0.16	0.15	0.16	0.17					0.21	0.6
U	1.17	1.43	1.2	1.18	1.44	1.11	1.25	1.18	1.88	1.95	2.11	1.24	2.83	1.45	1.35	0.5	0.68	0.92	0.9	0.67	2.02	1.92	1.85	1.79	1.84	1.93	2.15	1.87	2	2.16					42.9	7.93
V	72	77	78	73	76	85	75	92	82	63	79	91	80	86	91	142	147	164	150	158	42	45	42	37	40	39	43	38	42	47					23	108
W	1	1	1	2	1	1	1	2	1	1	1	3	1	1	1	1	1	1	1	<1	<1	<1	1	1	<1	<1	1	1	<1	1			3.6	4.8
Y	15.4	16.6	16.6	15.7	17	17.4	16.3	17.7	18.5	15.2	16.5	18.3	17.6	17	17.4	33.4	25.6	35.7	37.4	36.9	11.6	11.7	11.2	11	10.9	10.7	11.2	10.8	10.9	11.5					13.5	41.7
Yb	1.52	1.67	1.65	1.56	1.7	1.76	1.67	1.69	1.78	1.71	1.66	1.71	1.78	1.63	1.69	3.51	2.57	3.82	3.7	3.72	1.09	1.19	1.05	0.99	0.98	1	1.05	1	1.04	1.09					1.35	3.8
Zr	145	155	155	145	173	168	160	172	162	117	156	160	146	166	164	135	115	119	136	142	114	127	110	109	107	109	111	109	108	113					280	243
Sr/Y	23.1169	22.5904	24.4578	20.2548	20.5882	19.3103	24.908	26.1582	12.9189	18.2895	26.6667	23.2787	22.2727	25.1765	23.7931	11.0479	14.3359	7.2549	9.14439	9.48509	59.8276	56.1538	44.1071	43.1818	49.4495	53.3645	58.9286	38.8889	48.0734	61.1304
La/Yb	12.0395	12.2156	11.9394	13.7179	12.2353	9.82955	11.2575	11.3609	12.4157	11.5205	10.9036	10.9942	10.8989	10.9816	10.8876	5.49858	7.00389	4.86911	5.51351	6.02151	16.422	16.0504	18.2857	18.2828	18.5714	18.4	17.9048	18.2	19.1346	18.7156
(La/Yb)N	8.63591	8.76222	8.56412	9.83988	8.77637	7.05073	8.07499	8.1492	8.9058	8.26363	7.82116	7.8861	7.81776	7.87709	7.80965	3.94413	5.02389	3.49261	3.95484	4.31922	11.7795	11.513	13.1163	13.1143	13.3213	13.1983	12.8431	13.0549	13.7253	13.4247
(Gd/Yb)N	1.48579	1.43654	1.50911	1.49541	1.48418	1.54639	1.45636	1.58597	1.58944	1.30619	1.4751	1.59645	1.43607	1.60882	1.63982	1.38582	1.51931	1.26903	1.50247	1.42545	1.76834	1.73792	2.00116	1.95532	2.02592	2.03504	1.75692	1.96886	1.98063	1.81388
Dy/Yb	1.70395	1.67665	1.69697	1.69872	1.60588	1.67045	1.57485	1.76923	1.68539	1.44444	1.59036	1.82456	1.61236	1.71166	1.71598	1.50712	1.63813	1.44241	1.65405	1.62366	1.75229	1.73109	1.79048	1.79798	1.90816	1.92	1.82857	2.05	1.88462	1.83486
La/Yb	12.0395	12.2156	11.9394	13.7179	12.2353	9.82955	11.2575	11.3609	12.4157	11.5205	10.9036	10.9942	10.8989	10.9816	10.8876	5.49858	7.00389	4.86911	5.51351	6.02151	16.422	16.0504	18.2857	18.2828	18.5714	18.4	17.9048	18.2	19.1346	18.7156
Zr/Sm	52.1583	50.9868	54.007	52.1583	53.7267	53.3333	55.1724	51.1905	48.2143	42.2383	53.7931	46.2428	46.6454	51.3932	50.1529	23.3161	25	20.8406	20.8589	22.2571	37.8738	38.7195	34.1615	38.9286	38.3513	37.0748	38.676	37.2014	36.4865	37.0492
Nb/Ta	11.8333	10.4286	10.5714	10	10.7143	10.4286	9.75	11.4286	9.375	7.9	8.66667	12.5	6.75	12	13	12.6667	11.6667	11.3333	14.6667	14.3333	8.625	9.25	9.57143	9.28571	9.42857	10	9.14286	9.42857	9.42857	8.5
REE	85.12	94.25	92.06	94.37	96.09	87.46	89.49	93.81	104.17	88.21	86.6	93.9	92.13	88.17	90.48	129.86	111.89	132.56	143.42	147.06	84.31	88.77	88.38	82.99	84.97	84.93	85.9	84.39	91.15	92.64
δEu	0.833166	0.862546	0.898059	0.843349	0.797509	0.838562	0.891595	0.850022	0.839668	0.750507	0.928686	0.859513	0.825756	0.840767	0.868271	0.675905	0.885743	0.798057	0.72051	0.726654	0.877356	0.790039	0.855202	0.895773	0.850645	0.750285	0.737157	0.775668	0.889621	0.860574
Ba/Sr	1.30056	1.352	1.10591	1.64465	1.43143	1.3125	1.14286	0.900648	1.87866	1.38129	1.01364	1.03286	1.04847	0.964953	1.00483	1.30894	0.972752	1.21236	1.31871	0.962857	0.870317	0.940639	1.28745	1.31789	1	1.11208	2.18939	1.20714	1.30534	1.68563
Ba/La	25.3005	24.8529	22.7919	24.4393	24.0865	25.4913	24.6809	21.7188	20.3167	19.4924	24.6409	23.4043	21.1856	23.0726	22.6087	25.0259	19.8333	16.8817	22.1078	15.0446	33.743	32.356	33.125	34.5856	29.6154	34.5109	76.8617	27.8571	34.3719	58.0882
Th/Yb	6.94079	5.96407	5.76364	7.37179	5.17647	4.09659	5.22754	4.53846	6.34831	8.85965	4.30723	3.87135	4.61798	4.28834	3.48521	1.27066	1.64202	1.26963	1.18919	1.31989	6.41284	5.87395	6.41905	6.66667	6.54082	6.92	6.21905	6.91	6.33654	6.26606
Ba/Th	43.8863	50.9036	47.2135	45.4783	56.9318	61.165	53.1501	54.3677	39.7345	25.3465	62.3776	66.4653	50	59.0844	70.6282	108.296	84.5972	64.7423	102.5	68.6354	86.4092	88.412	94.362	94.8485	84.0874	91.763	221.286	73.3719	103.794	173.499
(La/Sm)N	4.24961	4.33211	4.43126	4.96949	4.17014	3.54551	4.18507	3.68897	4.24616	4.59124	4.02924	3.50772	4.00129	3.57761	3.63256	2.1519	2.52614	2.10291	2.01988	2.26658	3.8391	3.75926	3.84936	4.17315	4.21124	4.0403	4.22882	4.01002	4.34015	4.31791
Tzr(℃)	766.627	772.246	772.246	766.627	781.638	789.696	785.441	791.76	786.521	758.931	783.246	785.441	777.545	788.648	787.59	770.884	757.51	760.333	771.508	775.174	756.791	765.748	753.862	753.116	751.606	753.116	754.603	753.116	752.364	756.067
Nd/Sr	0.0398876	0.0416	0.0381773	0.0481132	0.0445714	0.0464286	0.0371921	0.0354212	0.0728033	0.05	0.0340909	0.0389671	0.0395408	0.0364486	0.0391304	0.0734417	0.0599455	0.107722	0.0883041	0.0868571	0.021902	0.0240487	0.0323887	0.0313684	0.028757	0.0260946	0.0237879	0.0357143	0.0316794	0.0243243
Hf/Nd	0.260563	0.25641	0.251613	0.24183	0.288462	0.269231	0.271523	0.256098	0.241379	0.230216	0.26	0.246988	0.251613	0.262821	0.240741	0.129151	0.136364	0.111111	0.122517	0.118421	0.210526	0.21519	0.1875	0.194631	0.193548	0.208054	0.197452	0.206667	0.180723	0.181287
Isr(t)	0.707924	0.707924	0.707924	0.708403	0.708403	0.707439	0.707439	0.707817	0.707817	0.707817	0.70779	0.70779	0.707632	0.707632	0.707632	0.707292	0.707292	0.707049	0.707049	0.707049	0.704204	0.704204	0.704204	0.704621	0.704621	0.704621	0.70564	0.70564	0.704974	0.704974
INd(t)	0.512059	0.512059	0.512082	0.512082	0.512082	0.512053	0.512053	0.51206	0.51206	0.51206	0.512064	0.512064	0.512085	0.512085	0.512085	0.512093	0.512093	0.51211	0.51211	0.51211	0.512377	0.512377	0.512377	0.512389	0.512389	0.512389	0.512384	0.512384	0.512394	0.512394
